# Supplementary material for: Epigenetic Quantification of Circulating Immune Cells in Peripheral Blood of Triple-negative Breast Cancer Patients
Source: Research Square preprint supplement (doi:10.21203/rs.3.rs-508197/v2), 2021-05-25
Supplement: Supplementary file 1 [file 3ce80fa306d4370956396773.docx]

| **Supplementary Table 5.** Associations of the immune cell type proportions and mdNLRref with TNBC after adjustment for confounders | | | |
| --- | --- | --- | --- |
|  |  |  |  |  |
| Subtype | OR [95% CI] | *P* | *Padj*a |  |
| Neutrophil | 1.83 [1.44-2.31] | < 1e-04 | < 1e-04 |  |
| Pan-lym | 0.55 [0.43-0.69] | < 1e-04 | < 1e-04 |  |
| NK | 0.13 [0.05-0.35] | < 1e-04 | 0.00019 |  |
| TCD4+ | 0.66 [0.51-0.84] | 0.00093 | 0.00371 |  |
| B cell | 0.31 [0.14-0.67] | 0.00287 | 0.00861 |  |
| TCD8+ | 0.79 [0.56-1.13] | 0.19690 | 0.39380 |  |
| Monocyte | 1.25 [0.54-2.86] | 0.60130 | 0.60130 |  |
| mdNLRref | 1.75 [1.39-2.20] | < 1e-04 | < 1e-04 |  |
| aAdjusted for body mass index, menopausal status, and smoking status (current). | | | |
